# Supplementary material for: Synthesis of 5′-GMP-mediated porous hydrogel containing β-FeOOH nanostructures: optimization of its morphology, optical and magnetic properties
Source: Royal Society of Chemistry journal article supplement (doi:10.1039/c3tb20877j), 2013-01-01
Supplement: c3tb20877j.pdf [file c3tb20877j.pdf]

## Electronic Supplementary Information

### Synthesis of 5'-GMP - mediated porous hydrogel containing $\beta$ -FeOOH nanostructures – optimization of its morphology, optical and magnetic properties

Anil Kumar and Sudhir Kumar Gupta

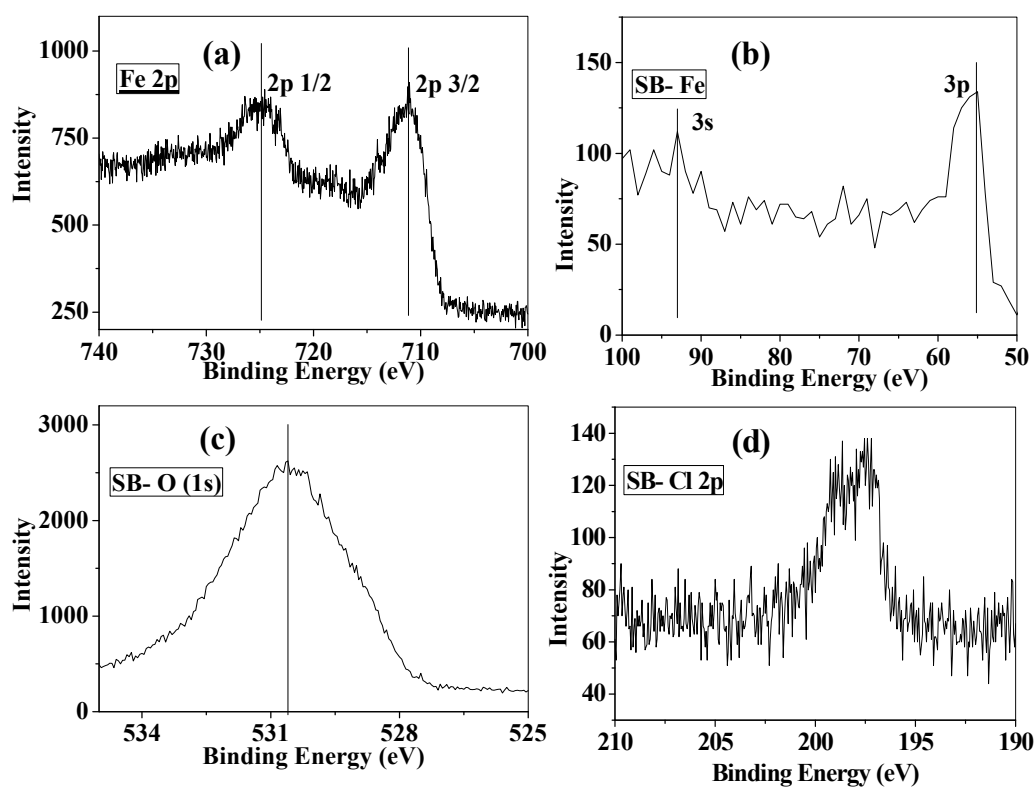

**Fig. S1** XPS analysis of sample SB for Fe 2p (a), Fe 3s and 3p (b), O 1s (c) and Cl 2p (d).

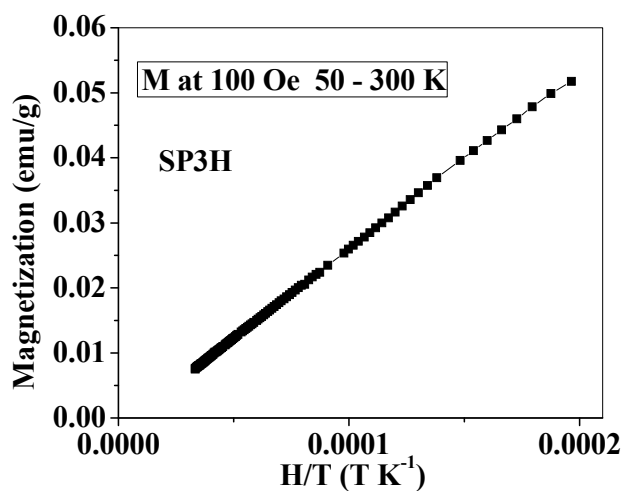

**Fig. S2** Magnetization versus H/T plot for SP3H from ZFC curve recorded at 100 Oe from 300-50 K.

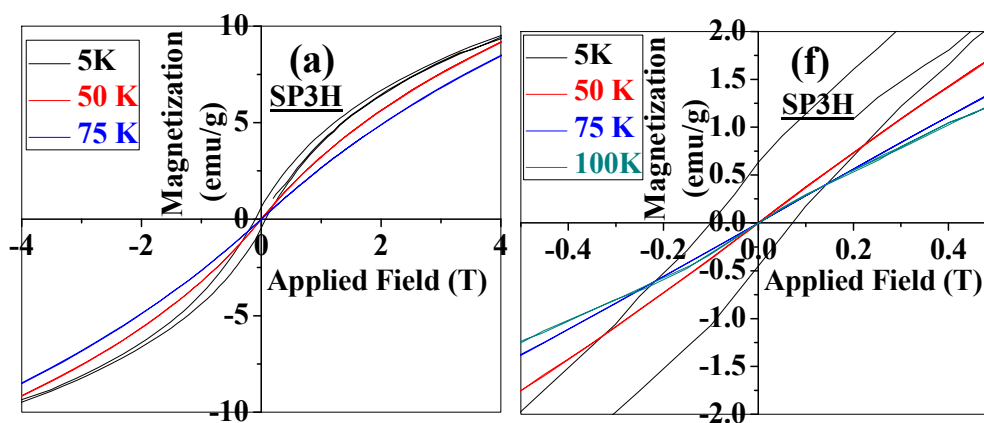

**Fig. S3** Magnetic hysteresis loop for SP3H at 5, 50 and 75 K (a); Magnified magnetic hysteresis loops for SP3H at 5, 50, 75 and 100 K (b).

**Table. S1** FTIR data for Na<sub>2</sub>-GMP, β-FeOOH, SP3 and SP3H.

| <b>Group/ Moeity</b>                                        | <b>Na<sub>2</sub>-GMP(cm<sup>-1</sup>) (Literature)</b> | <b>Na<sub>2</sub>-GMP (cm<sup>-1</sup>) (observed)</b> | <b>(SB) β-FeOOH (cm<sup>-1</sup>)</b> | <b>SP3 (cm<sup>-1</sup>) Fresh (observed)</b> | <b>SP3 (cm<sup>-1</sup>) Hydrogel (observed)</b> |
|-------------------------------------------------------------|---------------------------------------------------------|--------------------------------------------------------|---------------------------------------|-----------------------------------------------|--------------------------------------------------|
| <b>&gt;C(6)=O</b>                                           | 1700                                                    | 1696 (s)                                               | -                                     | 1676 (w & sh)                                 | 1676 (w & sh)                                    |
| <b>-NH<sub>2</sub></b>                                      | 1630                                                    | 1653 (sh)                                              | -                                     | 1637 (s)                                      | 1637 (s)                                         |
| <b>C=N and ring skeletal vibrations</b>                     | 1599                                                    | 1607 (m)                                               |                                       | 1600 (sh)                                     | 1600 (sh)                                        |
| <b>Pyrimidine/ Imidazole vibration</b>                      | 1539(m)                                                 | 1535 (s)                                               | -                                     | 1535 (sh)                                     | Almost disappeared                               |
| <b>N(7)-C(8) stretching, C(8)-H bending</b>                 | 1494 (s)                                                | 1481 (s)                                               | -                                     | 1481(m)                                       | 1482(w)                                          |
| <b>Imidazole</b>                                            | 1396 (s)                                                | 1416 (m)                                               |                                       | 1409 (w)                                      | 1402 (w)                                         |
| <b>Imidazole</b>                                            | 1358 (s)                                                | 1371 (m)                                               | -                                     | 1357(w)                                       | 1359(sh)                                         |
| <b>Pyrimidine</b>                                           | 1249 (w)                                                | 1256 (br)                                              | -                                     | 1261(w)                                       | 1259 (w)                                         |
| <b>ν-C-C (sugar)</b>                                        | 1176 (s)                                                | 1180                                                   |                                       | -                                             | -                                                |
| <b>ν-C-O (sugar)</b>                                        | 1132 (m)                                                | 1113 (sh)                                              |                                       | 1109 (sh)                                     | 1108 (sh)                                        |
| <b>PO<sub>3</sub><sup>2-</sup> antisymmetric stretching</b> | 1083 (m)                                                | 1090 (br)                                              | -                                     | 1069 (br)                                     | 1084 (br) (shape is changed)                     |
| <b>PO<sub>3</sub><sup>2-</sup> symmetric stretching</b>     | 982 (s)                                                 | 978 (s)                                                | -                                     | 991 (m)                                       | 989 (sh)                                         |
| <b>Sugar ring</b>                                           | 901 (s)                                                 | 905 (w)                                                |                                       | 904 (w)                                       | -                                                |
| <b>Sugar ring</b>                                           | 874 (s)                                                 | 866 (w)                                                | -                                     | 868 (w)                                       | -                                                |
| <b>P-O-5'-sugar</b>                                         | 822 (m)                                                 | 806 (m)                                                | -                                     | 799 (w)                                       | 802 (almost                                      |

|                                |         |                     |                   |                                      |                            |
|--------------------------------|---------|---------------------|-------------------|--------------------------------------|----------------------------|
| <b>C2'-endo/anti conformer</b> |         |                     |                   |                                      | disappeared)               |
| <b>P-O</b>                     | 783 (s) | 780 (m)             | -                 | 782(sh)                              | 781(w)                     |
| <b>Ring mode</b>               |         | 625 (w)             | -                 | 635 (w)                              | -                          |
| <b>Skeletal deformation</b>    | 548 (m) | 535 (w)             | -                 | -                                    | -                          |
| <b>H<sub>2</sub>O bending</b>  |         | -                   | 1634(s)           | 1637(s)                              | 1637 (s)                   |
| <b>O-H...Cl deformation</b>    |         | -                   | 833,              | -                                    | -                          |
| <b>Fe-O-Fe stretching</b>      |         | -                   | 696,644, 471, 420 | 681(br), 635 (w), 498 (sh), 483, 472 | 687(br), 631 (w), 470 (br) |
|                                |         | 1241, 724, 692, 580 | -                 | 1383, 799, 606                       | 1460, 1402, 1018           |

**Table. S2** XPS data of the samples SB and SP3H.

|                  | <b>SB</b>                          | <b>SP3H</b>                        |
|------------------|------------------------------------|------------------------------------|
| <b>Fe 2p 1/2</b> | <b>724.9</b> (726.3, 723.8)        | <b>724.9</b> (724.1, 726.4)        |
| <b>Fe 2p 3/2</b> | <b>711.1</b> (710.4, 712.3)        | <b>711.1</b> (710.6, 712.8)        |
| <b>O 1s</b>      | <b>530.5</b> (528.8, 530.4, 531.6) | <b>530.5</b> (529.2, 530.5, 531.9) |
| <b>P 2p</b>      | -                                  | <b>133.0</b>                       |
| <b>N 1s</b>      | -                                  | <b>399.2</b>                       |
| <b>C 1s</b>      | -                                  | <b>283.9</b>                       |
| <b>Cl 2p 1/2</b> | <b>198.9</b>                       | -                                  |
| <b>Cl 2p 3/2</b> | <b>197.4</b>                       | -                                  |
| <b>Fe 3s</b>     | <b>93.0</b>                        | <b>94.1</b>                        |
| <b>Fe 3p</b>     | <b>55.1</b>                        | <b>55.1</b>                        |
| <b>VB</b>        | <b>22.9</b>                        | <b>22.1</b>                        |
| <b>VB</b>        | <b>4.0</b>                         | <b>6.1</b>                         |

**Table. S3** Various magnetic paprameters for SP3 and SP3H.

|             | <b>T<sub>b</sub></b> |               | <b>M<sub>s</sub></b><br><b>(300 K)</b> | <b>M<sub>s</sub></b><br><b>(100 K)</b> | <b>M<sub>s</sub></b><br><b>(5 K)</b> |
|-------------|----------------------|---------------|----------------------------------------|----------------------------------------|--------------------------------------|
|             | <b>100 Oe</b>        | <b>500 Oe</b> |                                        |                                        |                                      |
| <b>SP3</b>  | 25.4                 | 26.0          | 3.2                                    | 6.9                                    | 12.0                                 |
| <b>SP3H</b> | 39.9                 | 38.6          | 4.9                                    | 9.2                                    | 12.4                                 |
